# Supplementary material
Source: PubMed Central journal article supplement (PMC2880176)
Supplement: NIHMS139262-supplement-1.pdf [file NIHMS139262-supplement-1.pdf]

## Supplementary Information

### Coupling retroviral production with a selectable event: selection of transcription factors that modulate $\gamma$ -globin expression

Ulrich Tschulena, Kenneth R. Peterson, Beatriz Gonzalez, Halyna Fedosyuk & Carlos F. Barbas III

Supplementary Table 1:

| TF <sub>ZF</sub>      | Zinc finger helices <sup>a</sup> |         |         |         |         | Target site         | % Transduction <sup>b</sup> | Fold act. (luc) <sup>c</sup> | Fold act. (endogenous) <sup>d</sup> |      |
|-----------------------|----------------------------------|---------|---------|---------|---------|---------------------|-----------------------------|------------------------------|-------------------------------------|------|
|                       | F1                               | F2      | F3      | F4      | F5      |                     |                             |                              |                                     |      |
| Ala-VP64              | ASAALVA                          | ASAALVA | ASAALVA | ASAALVA | ASAALVA | no DNA binding      | 10                          | 1                            | 1,5                                 |      |
| gg1-VP64              | DCRDLAR                          | RNDALTE | RSDHLTN | QSGDLRR | RKDNLKN | DPGALVR             | GTC AAG GCA AGG CTG GCC     | 75                           | 5,8                                 | 16,7 |
| # $\gamma$ A-VP64     | DPGHLIR                          | QLAHLRA | TSGSLVR | DKKDLTR | TSGNLVR | GAT ACC GTT AGA GGC | 73                          | 3,9                          | 3,7                                 |      |
| # $\gamma$ B-VP64     | DPGNLVR                          | DPGNLVR | DPGHLVR | HRTTLTN | SPADLTR | ACA AGT GGC GAC GAC | 17                          | 0,9                          | -                                   |      |
| # $\gamma$ C-VP64     | TSGHLVR                          | QKSSLIA | RSDHLTN | DSGNLVR | SPADLTR | ACA AAC AGG ATA GGT | 17                          | 1,4                          | -                                   |      |
| # $\gamma$ D-VP64     | HKNALQN                          | RTDTLRD | QSSNLVR | QRANLRA | DPGHLVR | GGC AAA GAA ACG ATT | 11                          | 1,2                          | -                                   |      |
| # $\gamma$ E-VP64     | QSSNLVR                          | QRANLRA | TSGSLVR | RTDTLRD | DKKDLTR | ACC ACG GTT AAA GAA | 48                          | 2,6                          | -                                   |      |
| # $\gamma$ F-VP64     | DCRDLAR                          | RNDALTE | QSGDLRR | RKDNLKN | DPGALVR | GTC AAG GCA CTG GCC | 41                          | 2,5                          | -                                   |      |
| # $\gamma$ G-VP64     | TTGNLTV                          | TSGHLVR | DSGNLVR | DKKDLTR | HKNALQN | ATT ACC AAC GGT AAT | 20                          | 2,3                          | -                                   |      |
| # $\gamma$ H-VP64     | DPGNLVR                          | ERSHLRE | RSDHLTN | HKNALQN | -       | ATT AGG AGC GAC     | 15                          | 1,3                          | -                                   |      |
| # $\gamma$ J-VP64     | HRTTLTN                          | QSSNLVR | QLAHLRA | QRANLRA | RRDELNV | ATG AAA AGA GAA AGT | 18                          | 1,8                          | -                                   |      |
| # $\gamma$ K-VP64     | DPGNLVR                          | QSSSLVR | QRANLRA | SPADLTR | RTDTLRD | ACG ACA AAA GTA GAC | 69                          | 3,1                          | 4,3                                 |      |
| # $\gamma$ L-VP64     | HKNALQN                          | QRANLRA | TSGSLVR | RTDTLRD | HRTTLTN | AGT ACG GTT AAA ATT | 78                          | 2,9                          | 8,7                                 |      |
| # $\gamma$ M-VP64     | RRDELNV                          | DPGNLVR | SPADLTR | QSSNLVR | QSGDLRR | GCA GAA ACA GAC ATG | 51                          | 3,8                          | 13,5                                |      |
| # $\gamma$ N-VP64     | HKNALQN                          | TTGNLTV | QRAHLER | TSGHLVR | HRTTLTN | AGT GGT GGA AAT ATT | 8                           | 0,6                          | -                                   |      |
| # $\gamma$ O-VP64     | SPADLTR                          | RTDTLRD | DKKDLTR | QSSNLVR | TSGELVR | GCT GAA ACC ACG ACA | 15                          | 0,8                          | -                                   |      |
| # $\gamma$ P-VP64     | DKKDLTR                          | QRANLRA | HRTTLTN | ERSHLRE | QKSSLIA | ATA AGC AGT AAA ACC | 17                          | 1,4                          | -                                   |      |
| # $\gamma$ A-opt-VP64 | TSGHLVR                          | QAGHLAS | TSGSLVR | DCRDLAR | TSGNLVR | GAT GCC GTT TGA GGT | 68                          | 4,1                          | 7,8                                 |      |

### DNA interacting helices of 5-ZF clones from the fifth round of selection and their predicted target sites compared to control ZFs.

<sup>a</sup> Zinc finger helices are positioned in the anti-parallel orientation (C-terminal-F5 to F1-N-terminal) relative to the DNA target sequence. Amino acid positions -1 to +6 of each DNA recognition helix are shown. It should be noted that gg1-VP64 has six zinc finger domains rather than five. <sup>b</sup> Percentage of 293T cells that were GFP<sup>+</sup> in transduction efficiency test. <sup>c</sup> Fold increase in relative luciferase activity in HeLa cells standardized to the non-DNA binding Ala-ZF negative control. <sup>d</sup> Fold activation of human  $\gamma$ -globin in  $\beta$ -YAC BMCs containing selected zinc-fingers measured by RT-PCR.

## Supplementary Methods

### Construction of pPur- $\gamma$ -gp

For the construction of pPur- $\gamma$ -gp, expressing murine leukemia virus (MLV) gag and pol genes under the control of  $\gamma$ -globin promoter and enhancer region, oligonucleotides pPur-Linker-for (AATTAGATCTCGAAGTGCTAGCCGAAGTGGCCGGCCCGAAGTG) and pPur-linker-rev (AATTCACCTTCGGGCGGCCACTTCGGCTAGCACTTCGAGATCT) were annealed and the duplex was subcloned into the pPur plasmid (BD Biosciences) linearized with EcoR1; this introduced BglII, NheI and FseI sites. To introduce the  $\gamma$ -globin promoter and enhancer region (HS2/3 of LCR) into this plasmid, a fragment was amplified by PCR from the  $\gamma\beta$ -luc plasmid using oligonucleotides containing a NheI site (gb-luc-f, GCTCGACAGATCTCGAGCTGTGGATAAAGGAG, and gb-luc-Nhe-b, CCATTAGCTAGCTTGGACTAGGAGCTTATTGATA). This fragment was digested with NheI and BglII and ligated into the digested plasmid. Into the resulting plasmid a 220-bp PCR fragment containing SV40 poly-A (SV40pA-Fse-f, ATCAGCTAGCCGGGCGGCCGCTTCGAGCAGACATGATAAGATAC, and SV40pA-EcoR-b, TCAAGAATTCTACGTTTACCACATTTGTAGAGG) was ligated after digestion with EcoRI and NheI, producing pPur- $\gamma$ -pA and inserting a FseI site. A 5.2-kb PCR fragment containing murine leukemia virus gag-pol genes derived from the pHit60 plasmid was amplified using the oligonucleotides Hit-gp-Nhe-f (GAGGAGGAGGAGCTAGCATGGGCCAGACTGTTACCACTCCCTTAAGTTTG) and Hit-gp-Fse-b (TCAGTGGCCGGCCTTAGGGGGCCTCGCGGGTTAACCT). This fragment was ligated into the pPur- $\gamma$ -pA plasmid after digestion with FseI and NheI to create pPur- $\gamma$ -gp.

### Construction of # $\gamma$ A-opt

The modified protein, # $\gamma$ A-opt, was constructed using the SuperZif-plasmid. Briefly, three SuperZiF plasmids were synthesized containing all of the GNN, ANN, or CNN domains previously published; one SuperZiF plasmid each for the GNN, ANN, and CNN zinc-finger domains. For library assembly, /XhoI/ and /XmaI/ restriction sites are 5' to each finger and /AgeI/ and /SpeI/ sites are 3' to each finger. When creating zinc-finger libraries, the SuperZiF plasmids can be cut with /XhoI/ and /SpeI/ to release each finger's coding sequence in equal molar quantities, thereby reducing library bias. For constructing designed proteins, unique restriction sites were placed between each finger, enabling the isolation of any individual finger from the appropriate SuperZiF vector.
